# Supplementary material
Source: Springer Nature journal article supplement (https://www.springermedizin.de/resource/supplementary/12889_2011_4927_MOESM2_ESM.pdf/9493040)

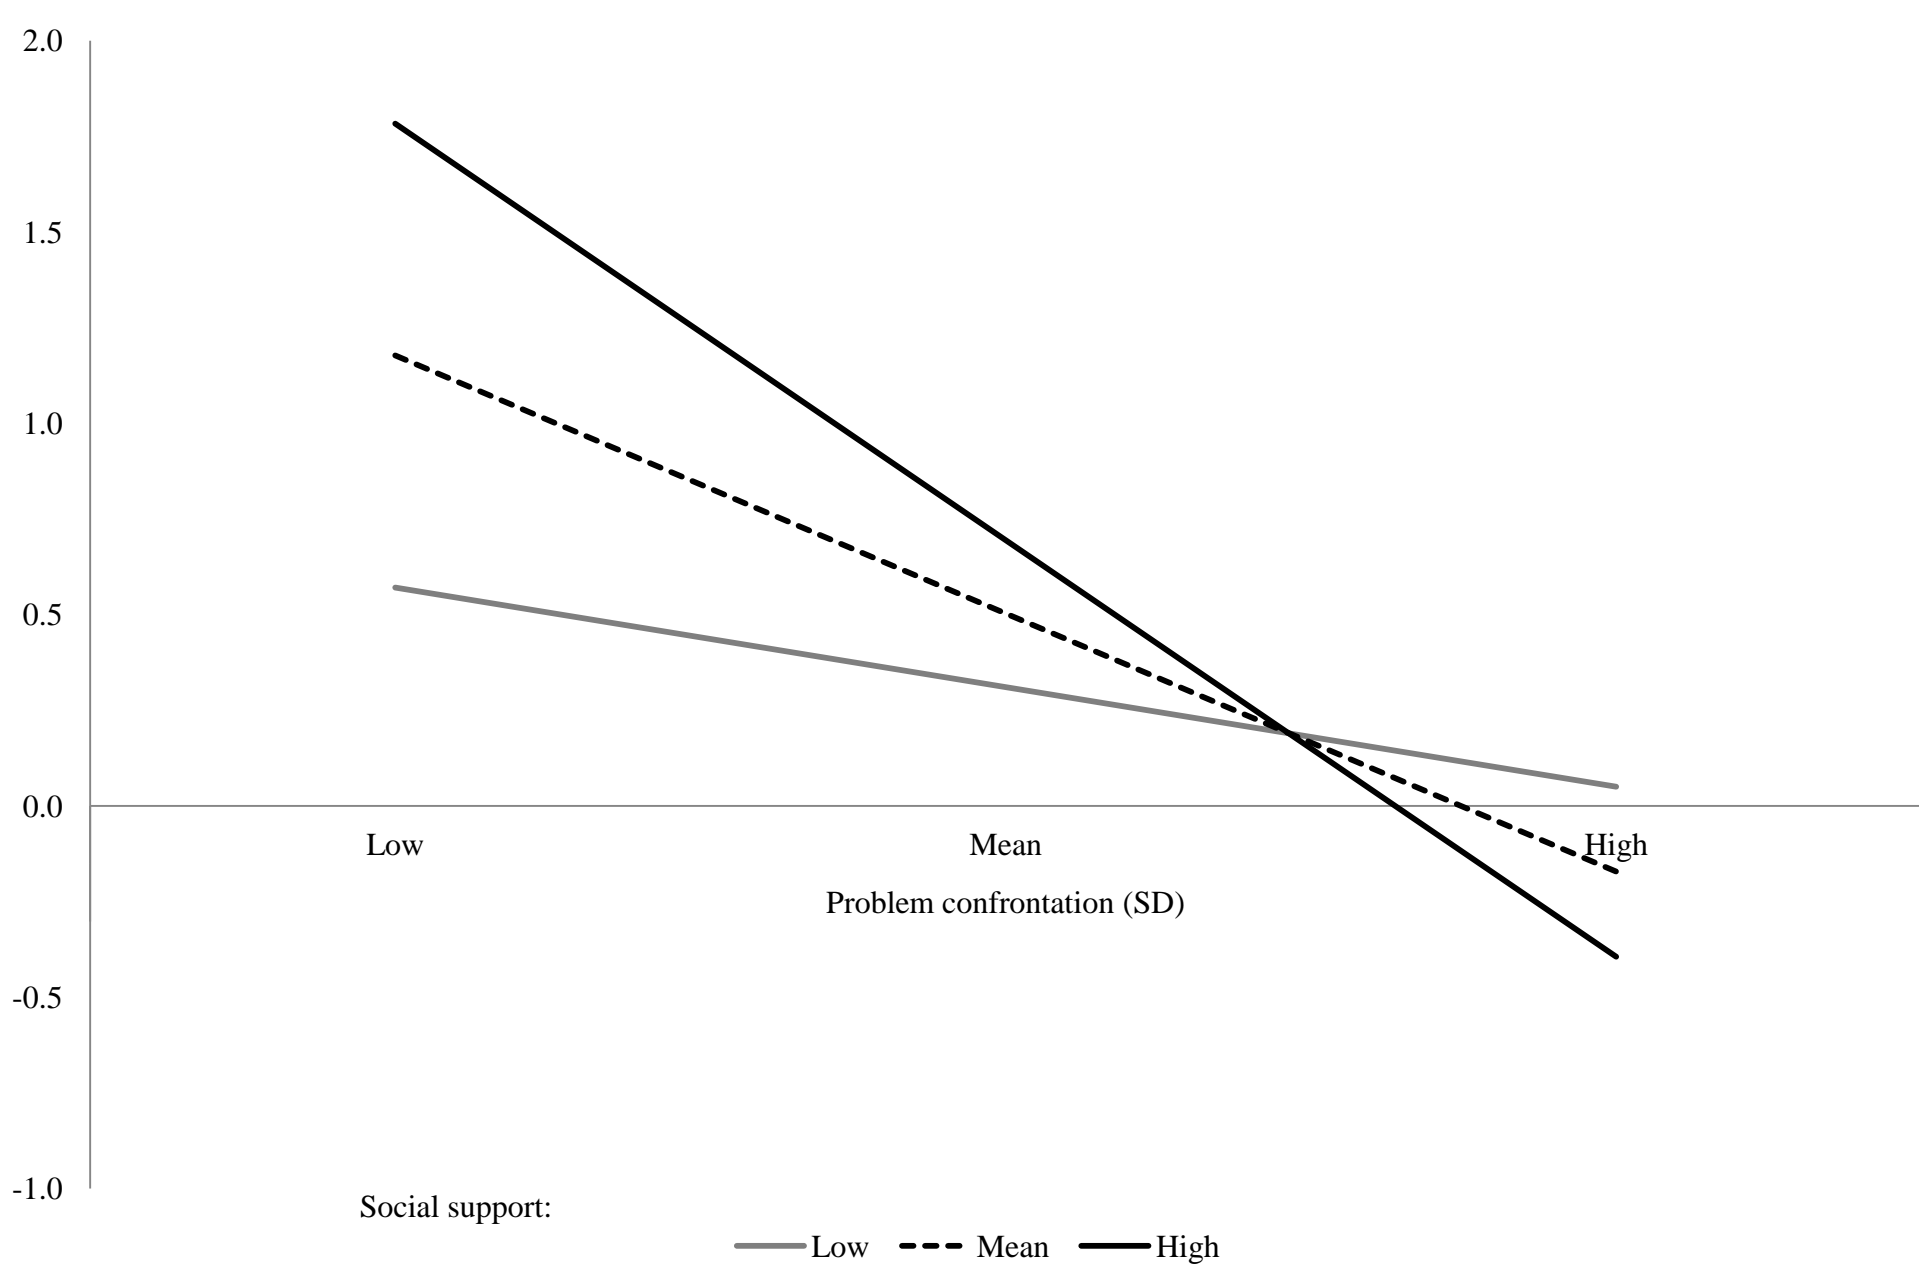

Supplement: MOESM2 [file 9493040]
